# Supplementary material for: Analyses of gene families, allelic variation and VIGS reveal that GheIF3M.2 is significantly associated with dwarfism in upland cotton
Source: Research Square preprint supplement (doi:10.21203/rs.3.rs-7305083/v1), 2025-08-18
Supplement: Supplementary file 1 [file 739fd798f55f726fda42c224.xlsx]

## Sheet: Sheet1
Table S1 Analysis of genophysical and chemical properties of GheIF3 complex genes
ID	Rename	size(AA)	MW	PI	Instability index	Aliphatic index	Grand average of hydropathicity (GRAVY)	Subcellular localization
GH_D08G2352.1	GheIF3A.1	997	115409	9.43	56.33	82.25	-0.774	Cytoplasmic
GH_A08G2348.1	GheIF3A.2	1017	117290	9.47	56.38	82.93	-0.719	Cytoplasmic
GH_A11G3004.1	GheIF3A.3	998	115723	9.42	59.88	81.47	-0.781	Cytoplasmic
GH_D11G3033.1	GheIF3A.4	998	115769	9.4	59.44	81.37	-0.8	Cytoplasmic
GH_A03G2432.1	GheIF3B.1	716	82421	5.07	36.04	71.47	-0.579	Cytoplasmic
GH_A12G0449.1	GheIF3B.2	715	82521.4	5.15	36.37	75.93	-0.534	Cytoplasmic
GH_D02G2594.1	GheIF3B.3	716	82453.1	5.07	36.75	71.61	-0.579	Cytoplasmic
GH_D12G0461.1	GheIF3B.4	715	82373	5.07	38.14	75.52	-0.535	Cytoplasmic
GH_D09G1418.1	GheIF3C	918	103709	5.14	44.57	77.25	-0.618	Cytoplasmic
GH_D10G0292.1	GheIF3D.1	579	65705.3	5.26	42.31	71.42	-0.683	Cytoplasmic
GH_A10G0280.1	GheIF3D.2	579	65735.4	5.21	42.17	73.26	-0.662	Cytoplasmic
GH_D06G1489.1	GheIF3D.3	579	65703.5	5.28	41.37	71.42	-0.66	Cytoplasmic
GH_A06G1417.1	GheIF3D.4	579	65749.5	5.28	41.04	71.92	-0.655	Cytoplasmic
GH_A05G1619.1	GheIF3D.5	577	65411	5.38	39.54	70.29	-0.669	Cytoplasmic
GH_D05G1647.1	GheIF3D.6	577	65373	5.33	39.54	70.8	-0.658	Cytoplasmic
GH_D11G3541.1	GheIF3E.1	437	51261.7	5.76	42.69	93.09	-0.423	Cytoplasmic
GH_D07G2451.1	GheIF3E.10	183	21370.4	5.71	36.2	93.88	-0.243	Cytoplasmic
GH_D07G1875.1	GheIF3E.11	183	21446.4	5.71	35.27	90.16	-0.305	Cytoplasmic
GH_A09G2711.1	GheIF3E.12	197	22801.7	4.58	49.33	90.2	-0.32	Cytoplasmic
GH_D03G0353.1	GheIF3E.13	172	20283.2	6.13	35.74	93.08	-0.305	Cytoplasmic
GH_D13G2522.1	GheIF3E.14	142	16742.3	6.12	36.96	100.92	-0.227	Cytoplasmic
GH_A11G3528.1	GheIF3E.2	437	51187.5	5.62	43.21	93.09	-0.411	Cytoplasmic
GH_D11G3542.1	GheIF3E.3	437	51153.5	5.4	43.69	93.09	-0.41	Cytoplasmic
GH_A11G3527.1	GheIF3E.4	383	44821.2	5.85	40.54	92.72	-0.392	Cytoplasmic
GH_D11G1331.1	GheIF3E.5	102	11701.2	4.99	37.45	84.31	-0.351	Cytoplasmic
GH_D06G1159.1	GheIF3E.6	183	21414.4	5.42	36.2	93.33	-0.272	Cytoplasmic
GH_A09G0658.1	GheIF3E.7	169	19749.5	5.63	46.57	95.92	-0.263	Cytoplasmic
GH_A11G2310.1	GheIF3E.8	183	21386.4	5.41	37.59	93.33	-0.254	Cytoplasmic
GH_D07G0014.1	GheIF3E.9	183	21370.4	5.71	36.2	93.88	-0.243	Cytoplasmic
GH_D13G0178.1	GheIF3F.1	286	31353.7	4.9	26.95	108.67	0.018	Cytoplasmic
GH_A13G0172.1	GheIF3F.2	286	31313.7	4.96	25.04	109.02	0.031	Cytoplasmic
GH_D10G2685.1	GheIF3F.3	286	31275.8	4.91	34.58	106.99	0.044	Cytoplasmic
GH_A10G2582.1	GheIF3F.4	286	31240.6	4.98	33.29	103.25	0.019	Cytoplasmic
GH_A06G1909.1	GheIF3G.1	312	34701.2	8.96	32.05	70	-0.656	Cytoplasmic
GH_D03G1390.1	GheIF3G.2	295	32553.7	8.84	34.11	68.78	-0.683	Cytoplasmic
GH_D10G2576.1	GheIF3G.3	290	32239.3	8.83	29.8	68.66	-0.718	Cytoplasmic
GH_A10G2467.1	GheIF3G.4	290	32192.3	8.83	29.32	68.66	-0.71	Cytoplasmic
GH_A03G0576.1	GheIF3G.5	296	32613.8	8.84	35.88	68.89	-0.656	Cytoplasmic
GH_D06G1935.1	GheIF3G.6	310	34469	8.81	32.16	70.13	-0.624	Cytoplasmic
GH_D13G2533.1	GheIF3G.7	288	31985.3	9.19	36.46	65.38	-0.752	Cytoplasmic
GH_A13G2537.1	GheIF3G.8	151	16730.9	9.08	25.77	55.56	-0.805	Cytoplasmic
GH_D05G3470.1	GheIF3H.1	337	38781.2	4.81	56.43	86.5	-0.354	Cytoplasmic
GH_D09G2193.1	GheIF3H.2	337	38705	4.75	56.16	85.64	-0.349	Cytoplasmic
GH_A09G2260.1	GheIF3H.3	337	38759.2	4.75	55.43	87.36	-0.326	Cytoplasmic
GH_D03G1870.1	GheIF3K.1	197	22452.6	5.09	37.58	92.13	-0.123	Cytoplasmic
GH_A03G0094.1	GheIF3K.2	203	23071.5	5.23	38.93	93.74	-0.047	Cytoplasmic
GH_A08G2557.1	GheIF3K.3	267	30884.2	4.93	35.83	96.48	-0.279	Cytoplasmic
GH_D08G2556.1	GheIF3K.4	267	30886.2	4.93	35.83	95.73	-0.287	Cytoplasmic
GH_A05G0364.1	GheIF3K.5	233	26780.8	5.67	44.18	101.67	-0.186	Cytoplasmic
GH_D05G0369.1	GheIF3K.6	233	26723.8	5.53	44.27	103.78	-0.123	Cytoplasmic
GH_D10G2395.1	GheIF3K.7	1013	111374	8	42.58	61.2	-0.732	Cytoplasmic
GH_A10G2304.1	GheIF3K.8	1013	111467	7.54	44.52	59.85	-0.744	Cytoplasmic
GH_A06G1038.1	GheIF3L.1	520	61354.2	5.91	42.66	90.67	-0.318	Cytoplasmic
GH_D06G1053.1	GheIF3L.2	520	61359.2	5.59	43.41	91.42	-0.294	Cytoplasmic
GH_D05G0495.1	GheIF3L.3	520	61423.3	5.95	43.25	88.25	-0.334	Cytoplasmic
GH_A05G0496.1	GheIF3L.4	520	61395.2	5.75	43.65	88.62	-0.329	Cytoplasmic
GH_D04G0357.1	GheIF3M.1	410	46210.8	5.1	35.88	102.27	0.021	Cytoplasmic
GH_A05G4016.1	GheIF3M.2	410	46328.8	5.1	35.52	99.41	-0.029	Cytoplasmic
GH_D09G0093.1	GheIF3M.3	409	45813.3	5.41	30.68	106.09	0.095	Cytoplasmic
GH_A09G0089.1	GheIF3M.4	409	45957.4	5.21	32.5	106.31	0.079	Cytoplasmic
