# Supplementary material for: Analyses of gene families, allelic variation and VIGS reveal that GheIF3M.2 is significantly associated with dwarfism in upland cotton
Source: Research Square preprint supplement (doi:10.21203/rs.3.rs-7305083/v1), 2025-08-18
Supplement: Supplementary file 1 [file b97ef10012abba22110ebaac.pdf]

**a**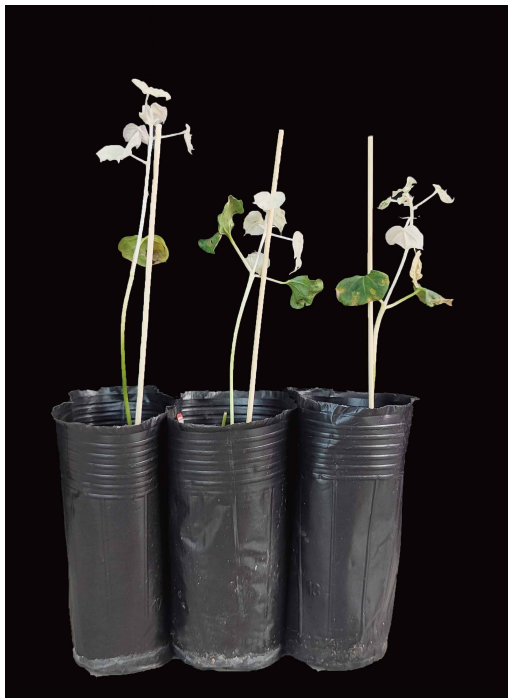**b**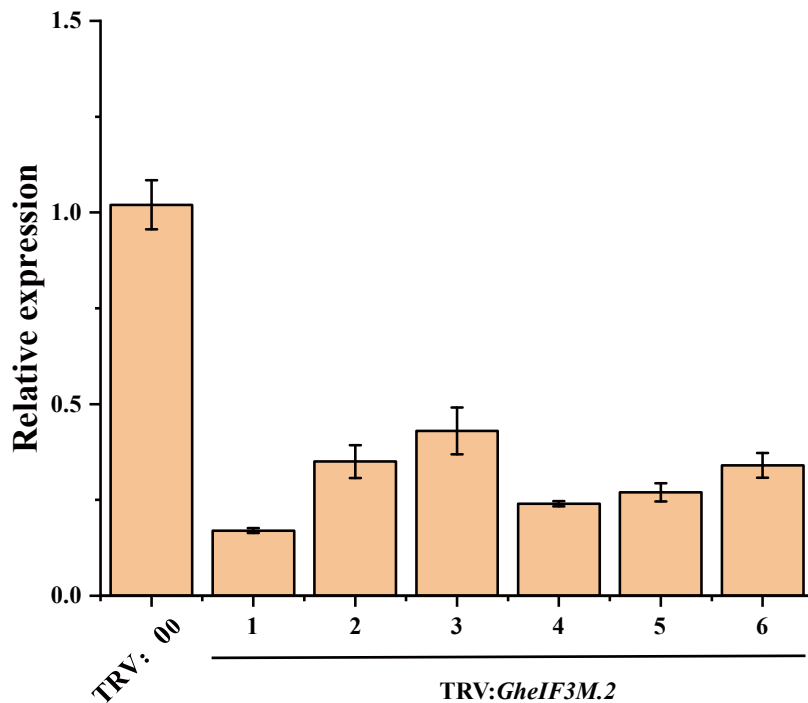

Fig. S1 Positive control and detection of silencing efficiency levels. a: Positive control albino plant; b: Expression level detection of the silenced plant. Compared with the control plant, if it is less than 0.5, then the silencing is successful.
