# Supplementary material for: Analyses of gene families, allelic variation and VIGS reveal that GheIF3M.2 is significantly associated with dwarfism in upland cotton
Source: Research Square preprint supplement (doi:10.21203/rs.3.rs-7305083/v1), 2025-08-18
Supplement: Supplementary file 2 [file afd64a33d7617045e91813a2.xlsx]

## Sheet: Sheet1
Table.S3 The primer sequences involved in this experiment
Gene name	Primer name	Sequence	description
GheIF3L.1	GH_A06G1038.1-F	AGATGTGGTTCCGCCATCTC	qRT-PCR for screening candidate genes
	GH_A06G1038.1-R	CACCATGTCCCACAACCACT	qRT-PCR for screening candidate genes
GheIF3L.4	GH_A05G0496.1-F	CGTCCACCTTTACCGTCACA	qRT-PCR for screening candidate genes
	GH_A05G0496.1-R	CGACGTAATGAGCAACTGCG	qRT-PCR for screening candidate genes
GheIF3G.8	GH_A13G2537.1-F	GCAAGACTGCCTACGTTCCT	qRT-PCR for screening candidate genes
	GH_A13G2537.1-R	GAACGGTGCGACAAGTTCAC	qRT-PCR for screening candidate genes
GheIF3G.1	GH_A06G1909.1-F	AATAACGACGACGACCCGAG	qRT-PCR for screening candidate genes
	GH_A06G1909.1-R	AGTGGAAACCATGGTGAGGC	qRT-PCR for screening candidate genes
GheIF3M.2	GH_A05G4016.1-F	TTGGACAGCATCAGTGGCAT	qRT-PCR for screening candidate genes
	GH_A05G4016.1-R	CGAATTGCCATCCCTTGCAT	qRT-PCR for screening candidate genes
GheIF3K.1	GH_D03G1870.1-F	GGCGTTCCTTTTCGAGACGA	qRT-PCR for screening candidate genes
	GH_D03G1870.1-R	GACCTATTTTCCAGGCCGCA	qRT-PCR for screening candidate genes
GheIF3L.1	GH_A06G1038.1-F	TATGCTCGCCTTTCTCCCAC	Construct silent fragment
	GH_A06G1038.1-R	GGAAGCAAGCACTTCAACCC	Construct silent fragment
GheIF3M.2	GH_A05G4016.1-F	ACCTGACACGTTTCGGTGTG	Construct silent fragment
	GH_A05G4016.1-R	TTGGATGGTGCTGATGAGGC	Construct silent fragment
GheIF3L.1	GH_A06G1038.1-MQF	GGAATTCTATGCTCGCCTTTCTCCCAC	Construct silent fragment
	GH_A06G1038.1-MQR	GGGGTACCGGAAGCAAGCACTTCAACCC	Construct silent fragment
GheIF3M.2	GH_A05G4016.1-MQF	GGAATTCACCTGACACGTTTCGGTGTG	Construct silent fragment
	GH_A05G4016.1-MQR	GGGGTACCTTGGATGGTGCTGATGAGGC	Construct silent fragment
GheIF3M.2	GH_A05G4016.1-F	CTCGGCTGCTTCAACCAAATC	Primers for fragment amplification of haplotypes
	GH_A05G4016.1-R	CAGACACCTTGGGAAAGACCA	Primers for fragment amplification of haplotypes
