# Supplementary material for: Analyses of gene families, allelic variation and VIGS reveal that GheIF3M.2 is significantly associated with dwarfism in upland cotton
Source: Research Square preprint supplement (doi:10.21203/rs.3.rs-7305083/v1), 2025-08-18
Supplement: Supplementary file 3 [file d0f67a3dd1f7f4c57bcb53c6.xlsx]

## Sheet: Sheet1
Table.S2 Calculation of ka/ks value of GheIF3s, GaeIF3s, and GreIF3s
Seq_1	Seq_2	Ka	Ks	Ka_Ks
GH_A03G0094.1	Gorai.003G177600.1	0.00768393	0.0424824	0.180873
GH_A03G0576.1	Gorai.003G128700.1	0.00449271	0.0332464	0.135134
GH_A03G2432.1	Gorai.005G267000.1	0.00236897	0.0474377	0.0499385
GH_A03G2432.1	Gorai.008G047600.1	0.034584	0.485095	0.0712933
GH_A03G0576.1	Gorai.013G261800.1	0.200161	0.919082	0.217784
GH_A05G0364.1	Gorai.009G038100.1	0.00186625	0.0443635	0.0420673
GH_A05G0496.1	Gorai.009G051100.1	0.00579074	0.0415331	0.139425
GH_A05G1619.1	Gorai.009G169000.1	0.003013	0.0597072	0.0504629
GH_A05G0496.1	Gorai.010G110200.1	0.0231512	0.298616	0.0775282
GH_A05G4016.1	Gorai.012G038600.1	0.0104961	0.0149305	0.702997
GH_A06G1417.1	Gorai.009G169000.1	0.0367318	0.641961	0.0572181
GH_A06G1038.1	Gorai.010G110200.1	0.00579393	0.0414511	0.139778
GH_A06G1909.1	Gorai.010G200400.1	0.00852686	0.0416131	0.204908
GH_A06G1417.1	Gorai.010G154200.1	0.00376153	0.038039	0.0988861
GH_A06G1417.1	Gorai.011G028500.1	0.031029	0.774507	0.0400629
GH_A08G2557.1	Gorai.004G260100.1	0.00324676	0.0506759	0.064069
GH_A08G2348.1	Gorai.007G303300.1	0.073171	0.39157	0.186866
GH_A09G2260.1	Gorai.006G227100.1	0.00253005	0.0568544	0.0445005
GH_A09G0089.1	Gorai.006G009500.1	0.0148271	0.0374961	0.39543
GH_A10G0280.1	Gorai.010G154200.1	0.0333687	0.734681	0.0454193
GH_A10G2467.1	Gorai.010G200400.1	0.0475422	0.639895	0.0742969
GH_A10G0280.1	Gorai.011G028500.1	0.00523954	0.0361827	0.144808
GH_A10G2304.1	Gorai.011G242800.1	0.00736628	0.0355601	0.20715
GH_A10G2467.1	Gorai.011G268900.1	0.00454834	0.10268	0.0442961
GH_A10G2582.1	Gorai.011G283100.1	0.0061872	0.0861706	0.0718017
GH_A10G2582.1	Gorai.013G019400.1	0.0379478	0.573996	0.0661115
GH_A11G3004.1	Gorai.007G300600.1	0.00952737	0.0304533	0.312852
GH_A11G3527.1	Gorai.007G355700.1	0.0174328	0.0692315	0.251805
GH_A12G0449.1	Gorai.005G267000.1	0.0333332	0.477622	0.06979
GH_A12G0449.1	Gorai.008G047600.1	0.00415534	0.0593352	0.0700316
GH_A13G0172.1	Gorai.011G283100.1	0.0380179	0.569234	0.0667878
GH_A13G0172.1	Gorai.013G019400.1	0.00309838	0.0642368	0.0482337
GH_D02G2594.1	Gorai.005G267000.1	0	0.00660797	0
GH_D02G2594.1	Gorai.008G047600.1	0.0339471	0.469725	0.0722702
GH_D03G1390.1	Gorai.003G128700.1	0	0.00467291	0
GH_D03G1870.1	Gorai.003G177600.1	0	0	0
GH_D03G1390.1	Gorai.013G261800.1	0.203986	0.959573	0.21258
GH_D04G0357.1	Gorai.012G038600.1	0.00313316	0	0
GH_D05G0369.1	Gorai.009G038100.1	0.00373774	0.0124034	0.301349
GH_D05G0495.1	Gorai.009G051100.1	0.00164971	0.0145777	0.113167
GH_D05G1647.1	Gorai.009G169000.1	0.00150508	0.0100462	0.149816
GH_D05G3470.1	Gorai.009G351400.1	0.00253915	0.0136367	0.186199
GH_D05G0495.1	Gorai.010G110200.1	0.027836	0.314001	0.0886493
GH_D05G1647.1	Gorai.010G154200.1	0.0362059	0.657602	0.0550575
GH_D05G1647.1	Gorai.011G028500.1	0.0445868	0.948448	0.0470102
GH_D06G1053.1	Gorai.009G051100.1	0.0274335	0.314974	0.0870979
GH_D06G1489.1	Gorai.009G169000.1	0.0373708	0.656789	0.0568993
GH_D06G1053.1	Gorai.010G110200.1	0.00496382	0.0116085	0.427604
GH_D06G1489.1	Gorai.010G154200.1	0.00225338	0	0
GH_D06G1935.1	Gorai.010G200400.1	0.0042488	0	0
GH_D06G1489.1	Gorai.011G028500.1	0.0310112	0.763033	0.040642
GH_D08G2556.1	Gorai.004G260100.1	0	0.00544962	0
GH_D08G2352.1	Gorai.007G303300.1	0.0739319	0.383067	0.193
GH_D09G1418.1	Gorai.006G145600.1	0.00326468	0.0167091	0.195383
GH_D09G2193.1	Gorai.006G227100.1	0.00252738	0.0232577	0.108669
GH_D09G0093.1	Gorai.006G009500.1	0.00527336	0.0109691	0.480746
GH_D10G0292.1	Gorai.009G169000.1	0.0449515	0.9578	0.046932
GH_D10G0292.1	Gorai.010G154200.1	0.0333559	0.75666	0.044083
GH_D10G0292.1	Gorai.011G028500.1	0.00298842	0.0230886	0.129433
GH_D10G2395.1	Gorai.011G242800.1	0.00129478	0.00697679	0.185584
GH_D10G2576.1	Gorai.011G268900.1	0	0.0343759	0
GH_D10G2685.1	Gorai.011G283100.1	0.00309119	0.0242347	0.127552
GH_D10G2685.1	Gorai.013G019400.1	0.0363756	0.511877	0.0710631
GH_D11G3033.1	Gorai.007G300600.1	0.00301735	0.0105304	0.286536
GH_D11G3541.1	Gorai.007G355700.1	0.00293495	0.0284226	0.103261
GH_D12G0461.1	Gorai.005G267000.1	0.0351901	0.461318	0.0762816
GH_D12G0461.1	Gorai.008G047600.1	0.00237154	0.00440207	0.538734
GH_D13G0178.1	Gorai.011G283100.1	0.0396236	0.560477	0.0706963
GH_D13G0178.1	Gorai.013G019400.1	0.00464998	0.014366	0.32368
GH_D13G2533.1	Gorai.013G261800.1	0.00454203	0.0150381	0.302035
Ga01G2221.1	GH_A03G0576.1	0.00148717	0.0140904	0.105545
Ga01G2221.1	GH_D03G1390.1	0.00598806	0.0141291	0.423809
Ga03G2780.1	GH_A03G2432.1	0.00236885	0.00880906	0.268911
Ga03G2780.1	GH_A12G0449.1	0.0339505	0.507385	0.0669128
Ga03G2780.1	GH_D02G2594.1	0.00236768	0.040558	0.0583777
Ga03G2780.1	GH_D12G0461.1	0.0358089	0.473725	0.07559
Ga04G1761.1	GH_A05G4016.1	0.00208805	0.00742121	0.281362
Ga04G0645.1	GH_A10G2582.1	0.851499	1.53346	0.555279
Ga04G0645.1	GH_A13G0172.1	0.811444	1.4841	0.546758
Ga04G1761.1	GH_D04G0357.1	0.00944151	0.0149212	0.632757
Ga04G0645.1	GH_D10G2685.1	0.841853	1.44302	0.583398
Ga04G0645.1	GH_D13G0178.1	0.797755	1.43058	0.557643
Ga05G0385.1	GH_A05G0364.1	0.00186567	0	0
Ga05G0519.1	GH_A05G0496.1	0.00247593	0.00871259	0.284179
Ga05G1721.1	GH_A05G1619.1	0.00150555	0.00751415	0.200362
Ga05G1721.1	GH_A06G1417.1	0.0379362	0.65551	0.0578729
Ga05G1721.1	GH_A10G0280.1	0.0465868	0.935173	0.0498162
Ga05G0385.1	GH_D05G0369.1	0.00373658	0.0575669	0.0649085
Ga05G1721.1	GH_D05G1647.1	0.00301432	0.0569239	0.0529536
Ga05G3662.1	GH_D05G3470.1	0.00509556	0.0181278	0.281091
Ga05G0519.1	GH_D05G0495.1	0.00995177	0.0415742	0.239374
Ga05G1721.1	GH_D06G1489.1	0.0385759	0.664525	0.0580503
Ga05G0519.1	GH_D06G1053.1	0.0257212	0.293552	0.0876207
Ga05G1721.1	GH_D10G0292.1	0.0477708	0.95988	0.0497674
Ga06G1475.1	GH_A05G1619.1	0.0363473	0.643846	0.0564534
Ga06G2027.1	GH_A06G1909.1	0.0028342	0.00449776	0.630136
Ga06G1077.1	GH_A06G1038.1	0.00082531	0.0145213	0.0568345
Ga06G1475.1	GH_A06G1417.1	0	0	0
Ga06G1475.1	GH_A10G0280.1	0.031029	0.767494	0.040429
Ga06G2027.1	GH_A10G2467.1	0.0452026	0.675199	0.0669471
Ga06G1077.1	GH_D05G0495.1	0.0278477	0.326696	0.0852404
Ga06G1475.1	GH_D05G1647.1	0.0347664	0.649548	0.053524
Ga06G2027.1	GH_D06G1935.1	0.015713	0.0368313	0.42662
Ga06G1077.1	GH_D06G1053.1	0.00829482	0.0323183	0.25666
Ga06G1475.1	GH_D06G1489.1	0.00150197	0.0380712	0.0394517
Ga06G1475.1	GH_D10G0292.1	0.0306263	0.779757	0.0392767
Ga06G2027.1	GH_D10G2576.1	0.0500316	0.69959	0.0715155
Ga08G2423.1	GH_A08G2348.1	0.00175599	0.0045426	0.386561
Ga08G2643.1	GH_A08G2557.1	0	0	0
Ga08G2423.1	GH_D08G2352.1	0.00693246	0.0257211	0.269524
Ga08G2643.1	GH_D08G2556.1	0.00324676	0.0565239	0.0574404
Ga09G2341.1	GH_A09G2260.1	0.00126449	0	0
Ga09G0137.1	GH_A09G0089.1	0.00525857	0.00736654	0.713845
Ga09G1494.1	GH_D09G1418.1	0.00700803	0.0693835	0.101004
Ga09G2341.1	GH_D09G2193.1	0.00126316	0.0619399	0.0203933
Ga09G0137.1	GH_D09G0093.1	0.0148507	0.0334732	0.443659
Ga10G0255.1	GH_A03G0576.1	0.0966991	1.83096	0.0528132
Ga10G2806.1	GH_A05G1619.1	0.0465807	0.927222	0.0502369
Ga10G2806.1	GH_A06G1417.1	0.032593	0.760821	0.0428392
Ga10G0255.1	GH_A06G1909.1	0.0435977	0.675199	0.0645702
Ga10G0005.1	GH_A10G2582.1	0.00308404	0.00966976	0.318937
Ga10G2806.1	GH_A10G0280.1	0.00298935	0	0
Ga10G0255.1	GH_A10G2467.1	0	0.0096542	0
Ga10G0005.1	GH_A13G0172.1	0.0379778	0.624831	0.0607809
Ga10G0255.1	GH_D03G1390.1	0.0966076	1.85327	0.0521281
Ga10G2806.1	GH_D05G1647.1	0.0449834	0.926837	0.0485344
Ga10G0255.1	GH_D06G1935.1	0.0531888	0.634672	0.0838052
Ga10G2806.1	GH_D06G1489.1	0.0325742	0.735989	0.0442592
Ga10G0005.1	GH_D10G2685.1	0.00618879	0.070168	0.0881996
Ga10G2806.1	GH_D10G0292.1	0.00674036	0.0442357	0.152374
Ga10G0255.1	GH_D10G2576.1	0.00454834	0.108203	0.0420354
Ga10G0005.1	GH_D13G0178.1	0.0395818	0.604702	0.0654567
Ga11G0853.1	GH_A11G3004.1	0.00517988	0.0105318	0.491834
Ga11G0289.1	GH_A11G3527.1	0.031678	0.117391	0.269851
Ga11G0289.1	GH_D11G3541.1	0.0274112	0.130055	0.210767
Ga11G0853.1	GH_D11G3033.1	0.0103924	0.0430943	0.241155
Ga12G2419.1	GH_A03G0094.1	0.00767551	0.019085	0.402175
Ga12G2642.1	GH_A12G0449.1	0.00118507	0.0132747	0.0892728
Ga12G2419.1	GH_D03G1870.1	0.00437798	0.0229317	0.190914
Ga12G2642.1	GH_D12G0461.1	0.00534735	0.0498767	0.107211
Ga13G2744.1	GH_A03G0576.1	0.202782	0.926512	0.218866
Ga13G0192.1	GH_A10G2582.1	0.0412203	0.636666	0.0647439
Ga13G2744.1	GH_A10G2467.1	0.249962	1.78228	0.140248
Ga13G2744.1	GH_A13G2537.1	0.00289436	0.0189584	0.152669
Ga13G0192.1	GH_A13G0172.1	0	0.0240213	0
Ga13G2744.1	GH_D03G1390.1	0.206622	1.00446	0.205705
Ga13G0192.1	GH_D10G2685.1	0.0396446	0.559159	0.0709004
Ga13G2744.1	GH_D13G2533.1	0.0206619	0.0593348	0.348227
Ga13G0192.1	GH_D13G0178.1	0.00465238	0.0694137	0.067024
Ga01G2221.1	Gorai.003G128700.1	0.00599105	0.0188689	0.317509
Ga03G2780.1	Gorai.005G267000.1	0.00236768	0.0382463	0.0619061
Ga03G2780.1	Gorai.008G047600.1	0.0345648	0.482279	0.0716698
Ga04G1761.1	Gorai.012G038600.1	0.0083851	0.0149305	0.561608
Ga04G0645.1	Gorai.013G019400.1	0.799532	1.38075	0.579058
Ga05G1079.1	Gorai.004G228300.1	0.0258148	0.546783	0.0472122
Ga05G0385.1	Gorai.009G038100.1	0	0.0443635	0
Ga05G1079.1	Gorai.009G106100.1	0.00671521	0.0447727	0.149984
Ga05G1721.1	Gorai.009G169000.1	0.00452433	0.0569976	0.0793775
Ga05G3662.1	Gorai.009G351400.1	0.00509448	0.0320415	0.158996
Ga05G0519.1	Gorai.009G051100.1	0.00828852	0.0445455	0.186069
Ga05G1721.1	Gorai.010G154200.1	0.0393808	0.663634	0.0593411
Ga05G0519.1	Gorai.010G110200.1	0.0240082	0.298264	0.0804932
Ga05G1721.1	Gorai.011G028500.1	0.0477893	0.95743	0.0499142
Ga06G1077.1	Gorai.009G051100.1	0.0257266	0.332608	0.077348
Ga06G1475.1	Gorai.009G169000.1	0.0367318	0.641961	0.0572181
Ga06G2027.1	Gorai.010G200400.1	0.0113962	0.0368172	0.309535
Ga06G1077.1	Gorai.010G110200.1	0.00662622	0.0383942	0.172584
Ga06G1475.1	Gorai.010G154200.1	0.00376153	0.038039	0.0988861
Ga06G1475.1	Gorai.011G028500.1	0.031029	0.774507	0.0400629
Ga08G2313.1	Gorai.004G228300.1	0.0026741	0.0496983	0.0538067
Ga08G2423.1	Gorai.004G238100.1	0.0051922	0.0303762	0.17093
Ga08G2643.1	Gorai.004G260100.1	0.00324676	0.0506759	0.064069
Ga08G2423.1	Gorai.007G303300.1	0.0724513	0.39064	0.185469
Ga08G2313.1	Gorai.009G106100.1	0.0230657	0.460478	0.0500908
Ga09G1494.1	Gorai.006G145600.1	0.00700803	0.0693835	0.101004
Ga09G2341.1	Gorai.006G227100.1	0.00126369	0.0568993	0.0222092
Ga09G0137.1	Gorai.006G009500.1	0.0137679	0.0374026	0.368101
Ga10G0255.1	Gorai.003G128700.1	0.0949328	1.84043	0.0515819
Ga10G2806.1	Gorai.009G169000.1	0.0453656	0.933522	0.0485962
Ga10G0255.1	Gorai.010G200400.1	0.0475422	0.639895	0.0742969
Ga10G2806.1	Gorai.010G154200.1	0.0349369	0.728279	0.0479719
Ga10G0005.1	Gorai.011G283100.1	0.00308801	0.0860978	0.0358663
Ga10G2806.1	Gorai.011G028500.1	0.00674288	0.0361905	0.186316
Ga10G0255.1	Gorai.011G268900.1	0.00454834	0.10268	0.0442961
Ga10G0005.1	Gorai.013G019400.1	0.0347202	0.573311	0.0605608
Ga11G0289.1	Gorai.007G355700.1	0.031074	0.119794	0.259394
Ga11G0853.1	Gorai.007G300600.1	0.00821689	0.032066	0.25625
Ga12G2419.1	Gorai.003G177600.1	0.00437798	0.0229317	0.190914
Ga12G2642.1	Gorai.005G267000.1	0.0320967	0.465273	0.0689845
Ga12G2642.1	Gorai.008G047600.1	0.00296575	0.0498956	0.0594391
Ga13G2744.1	Gorai.003G128700.1	0.207761	1.01049	0.205605
Ga13G0192.1	Gorai.011G283100.1	0.0380179	0.579447	0.0656106
Ga13G2744.1	Gorai.013G261800.1	0.0222153	0.0433979	0.511899
Ga13G0192.1	Gorai.013G019400.1	0.00309838	0.0694137	0.0446364
